# Supplementary material for: Studies towards the catalytic anti-Markovnikov functionalisation of alkenes
Source: Royal Society of Chemistry journal article supplement (doi:10.1039/b708470f), 2007-09-14
Supplement: b708470f.pdf [file b708470f.pdf]

## Supplementary Information

### Studies Towards the Catalytic Anti-Markovnikov Functionalisation of Alkenes

**Christian J. Richard and Adrian W. Parkins\***

Department of Chemistry, King's College London, Strand, London WC2R 2LS, U.K.

#### Table of Contents

|                                                                                                                                                                                                               |      |
|---------------------------------------------------------------------------------------------------------------------------------------------------------------------------------------------------------------|------|
| 1. NMR Spectra .....                                                                                                                                                                                          | p.2  |
| 2. Notes concerning the NMR Spectra.....                                                                                                                                                                      | p.10 |
| 3. Mass spectra.....                                                                                                                                                                                          | p.11 |
| 3. Comments on the fate of <b>12</b> during the catalytic reactions, and background<br>information relating the newly discovered catalytic activity of <b>12</b> to Jensen and<br>Trogler's earlier work..... | p.12 |
| 4. References for Supplementary Information.....                                                                                                                                                              | p.14 |

**Figure S1**

The  $^{31}\text{P}\{^1\text{H}\}$  NMR( $\text{CDCl}_3$ ) spectrum and hydride region of  $^1\text{H}$  NMR spectrum of **4**. (see note below)

The  $^{31}\text{P}\{^1\text{H}\}$  NMR ( $\text{CDCl}_3$ ) spectrum of **4** at 145.7MHz

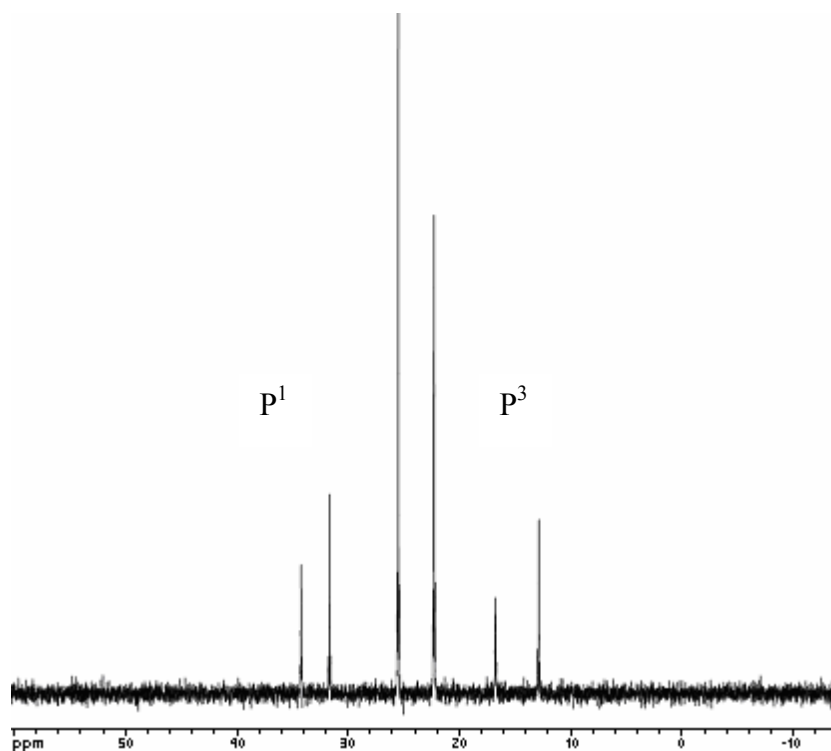

The high field  $^1\text{H}$  NMR ( $\text{CDCl}_3$ ) spectrum of **4** at 360.1MHz

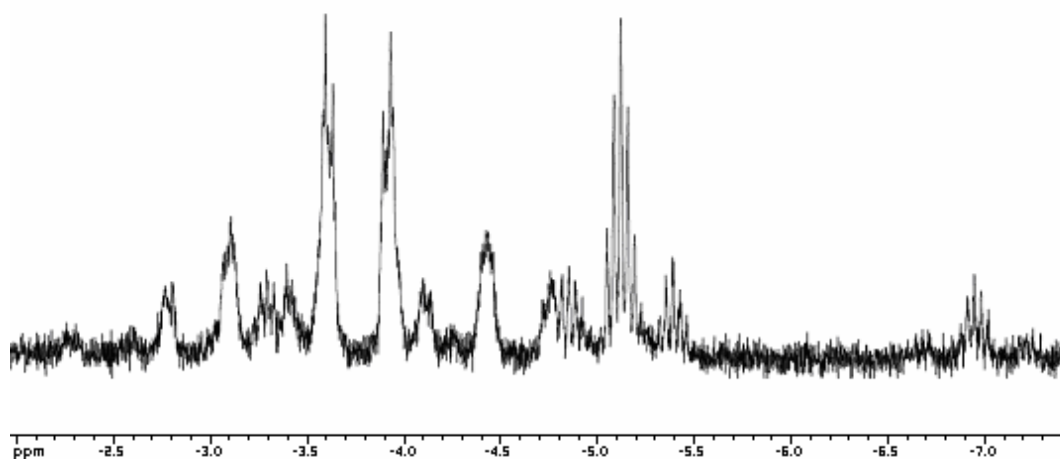

**Figure S2**

A typical  $^{31}\text{P}\{^1\text{H}\}$  NMR( $\text{CDCl}_3$ ) spectrum of the clusters **6** and **10**, present as a mixture in the inorganic products derived from **5** according to eqn (S1)

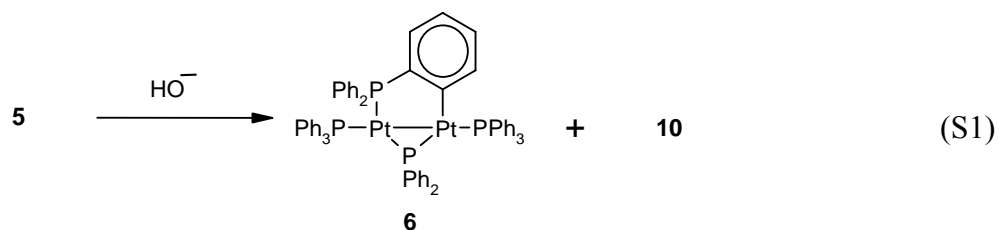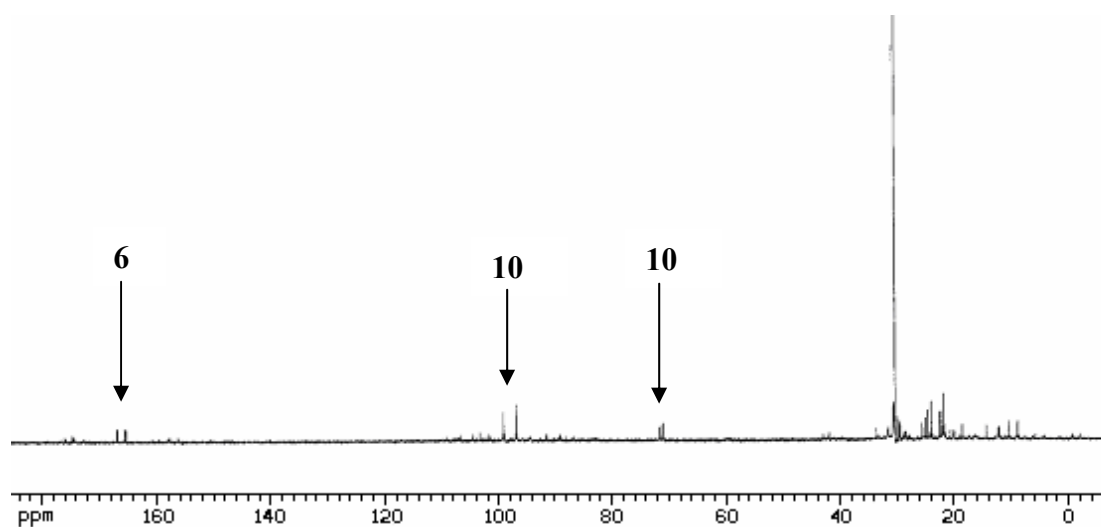

### Figure S3

The  $^{31}\text{P}\{^1\text{H}\}$  NMR( $\text{CDCl}_3$ ) spectrum of **6**, in the bridging phosphido region, derived from **5** by heating with 1-octene in 2-propanol under alkaline conditions. The spectrum shows excellent agreement with the spectrum published by Braunstein and co-workers.<sup>3</sup>

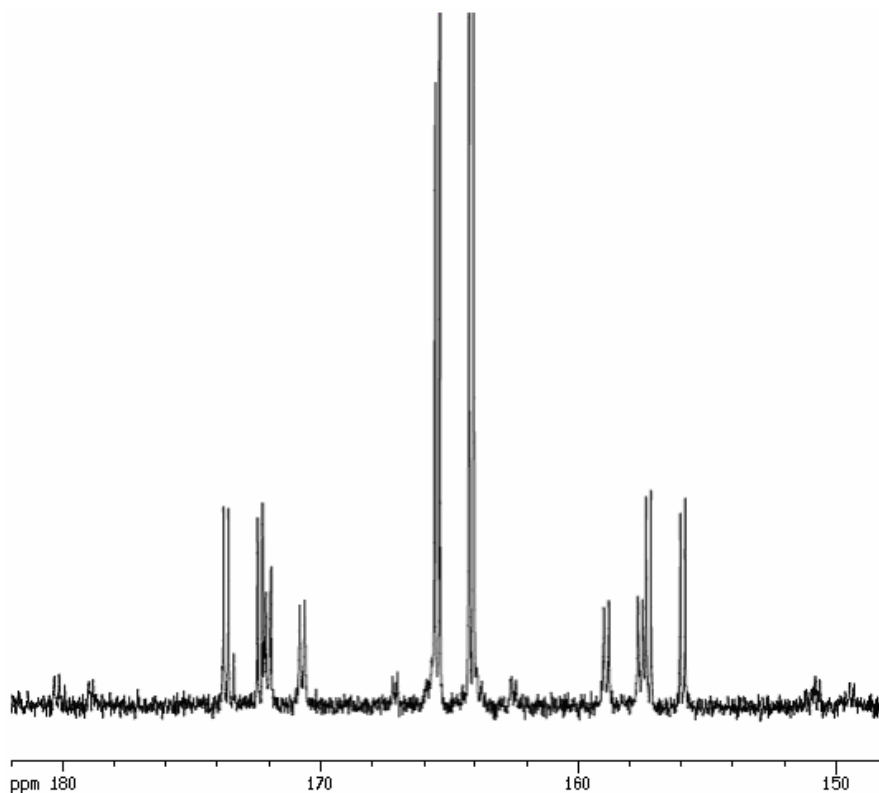

### Figure S4

The  $^{31}\text{P}\{^1\text{H}\}$  NMR( $\text{CDCl}_3$ ) spectrum of the mixture of products obtained by heating **5** with 1-octene in toluene with 2-propanol, but without added acid or base. The coupling constants observed for **7** within the mixture agree with those reported by Longoni and co-workers,<sup>4</sup> and so provided a method of identification. The spectrum of **8** has been reported by Dixon and co-workers.<sup>5</sup>

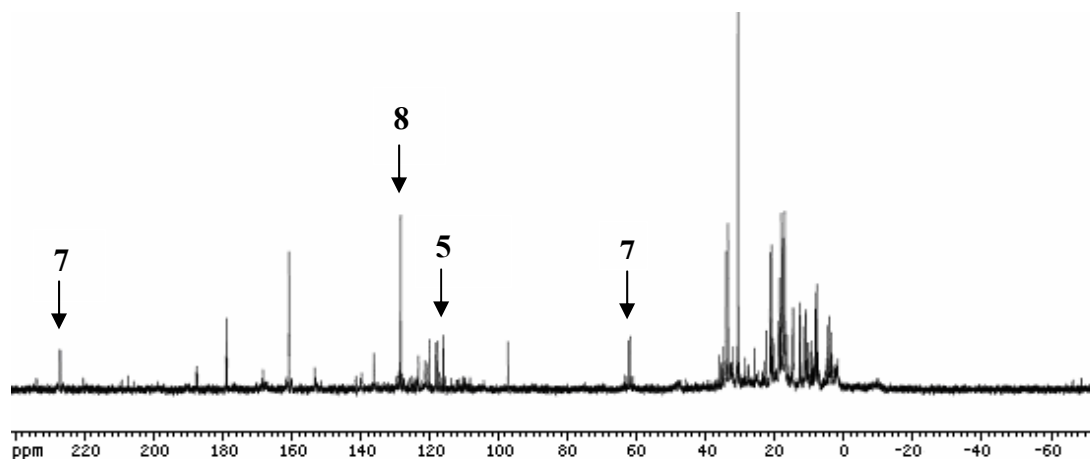

**Figure S5**

Expansion of the  $^{31}\text{P}\{^1\text{H}\}$  NMR( $\text{CDCl}_3$ ) spectrum of **7** in the bridging phosphido region  $\sim 225$  ppm and at  $\sim 60$  ppm. Longoni and co-workers,<sup>4</sup> also show these expansions.

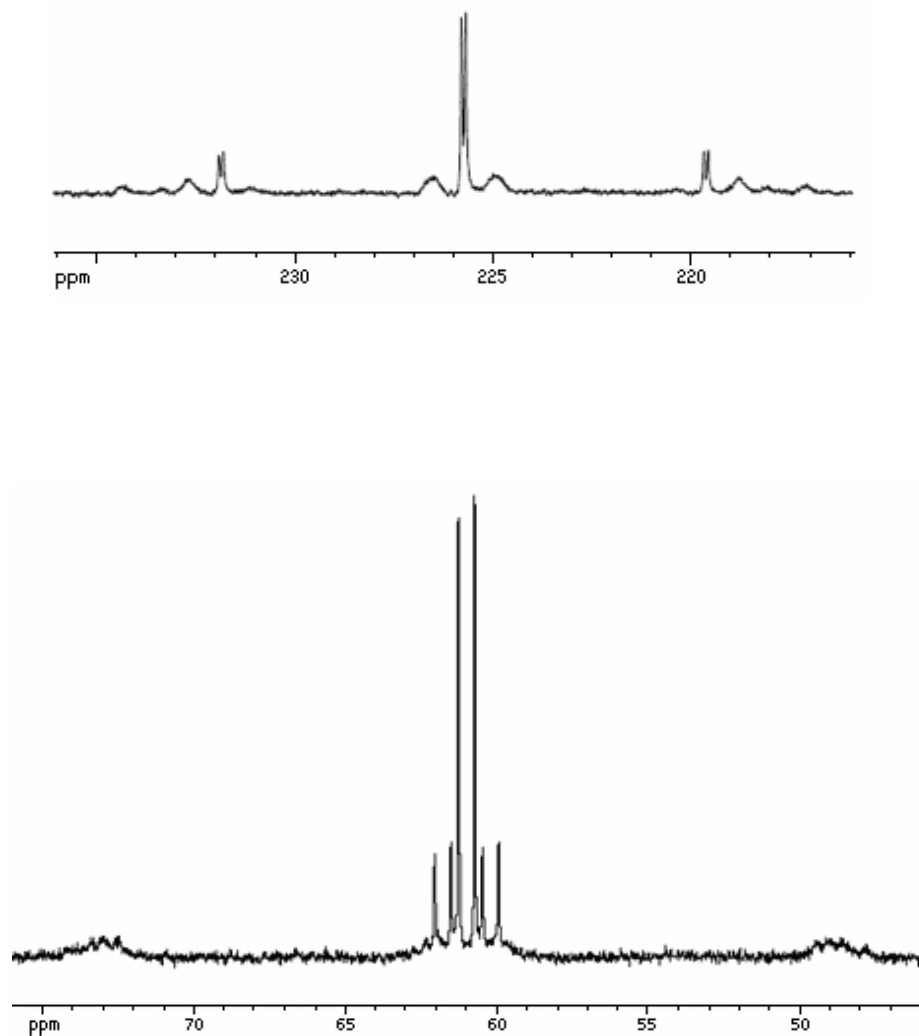

**Figure S 6**

The  $^{31}\text{P}\{^1\text{H}\}$  NMR( $\text{CDCl}_3$ ) spectrum of the mixture of products obtained by heating **5** with 1-octene in toluene with 2-propanol, with added  $\text{HBF}_4$ . Although this is a complex mixture, the peaks assigned to **11** can be used to suggest a structure (see below)

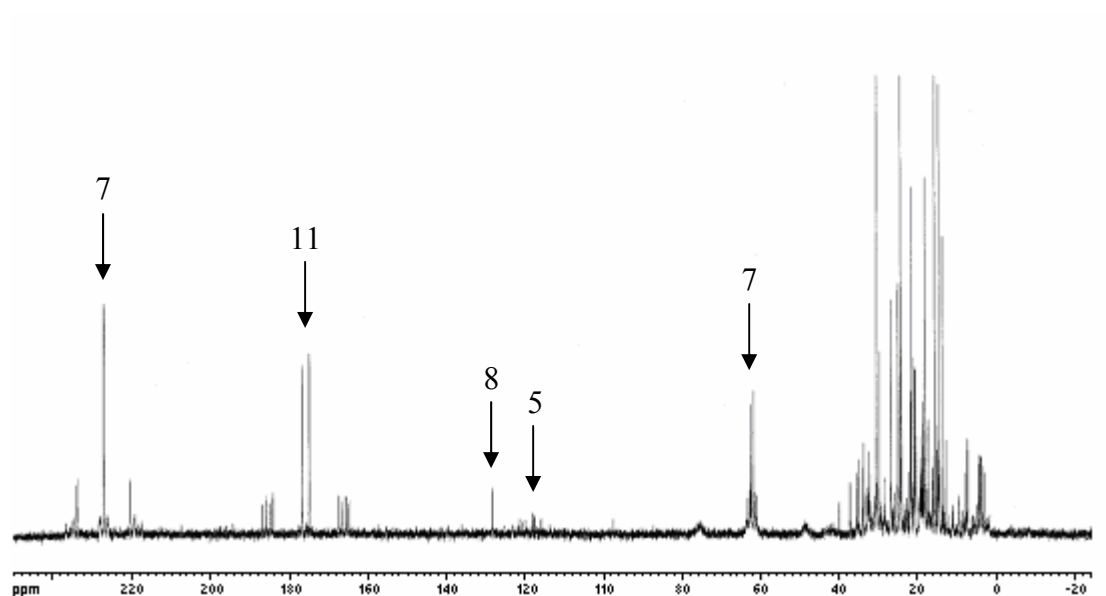

### Figure S7

The  $^{31}\text{P}\{^1\text{H}\}$  NMR( $\text{CDCl}_3$ ) spectrum of **11** in the bridging phosphido region. The structure was assigned on the basis of the similarity of the spectrum in the bridging phosphido region to that of  $[\text{Pt}_2(\mu\text{-H})(\mu\text{-PPh}_2)\text{Br}(\text{PPh}_3)_3]\text{PF}_6$  as reported by Braunstein and co-workers<sup>6</sup>

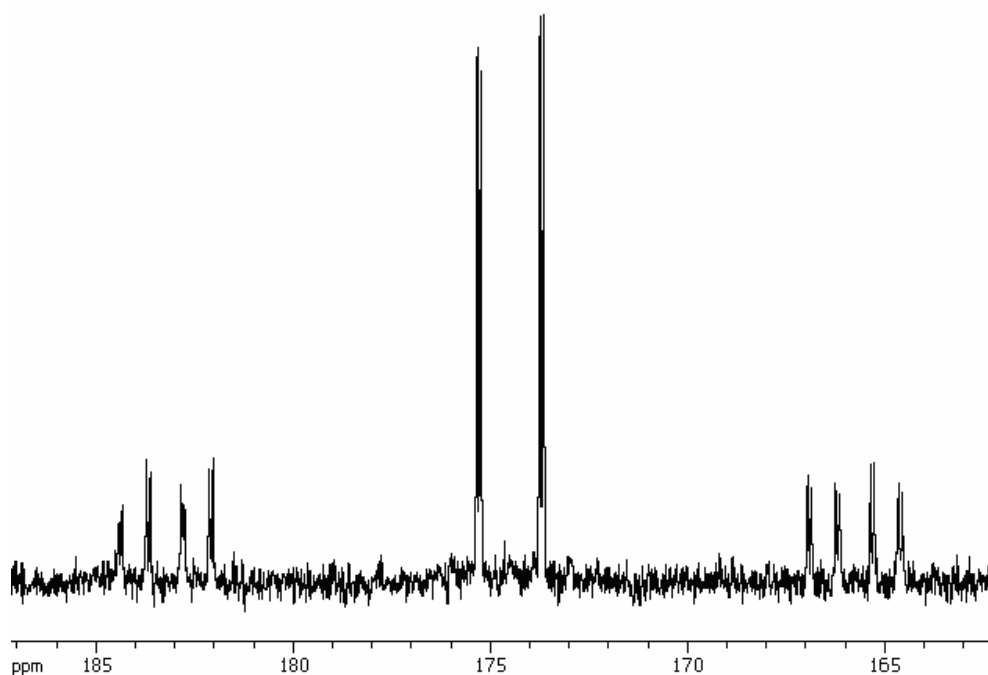

### Figure S8

The  $^{31}\text{P}\{^1\text{H}\}$  NMR( $\text{CDCl}_3$ ) spectrum of the mixture of products obtained by heating **5** in methanol but without 1-octene, and without the addition of acid or alkali.

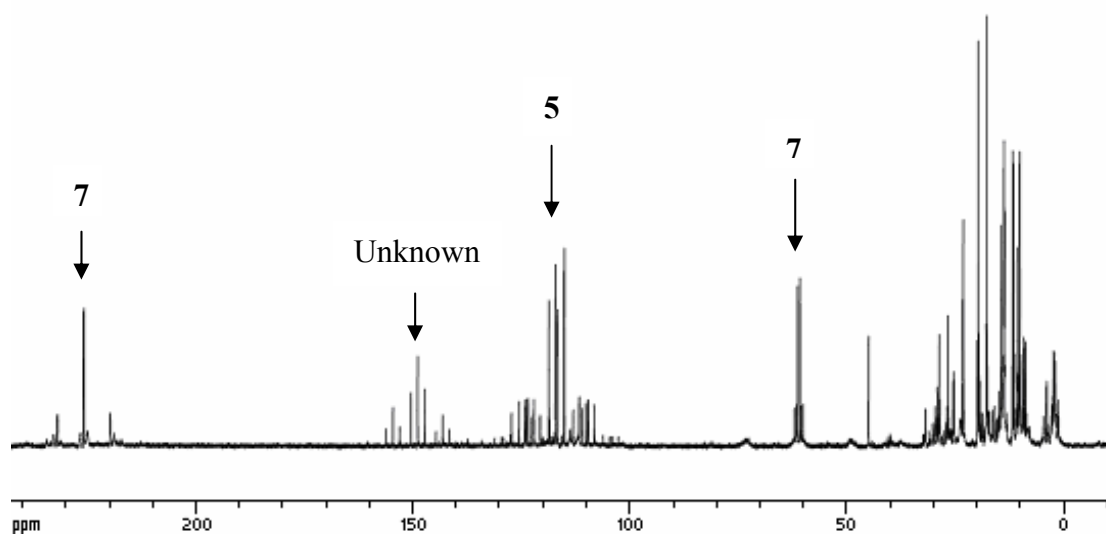

$^{31}\text{P}\{^1\text{H}\}$  NMR data corresponding to the multiplet marked unknown:

$\delta$  149 [ $^1\text{J}(\text{Pt-P})$  1854.4 Hz;  $^2\text{J}(\text{P-P})$  255.1 Hz]

**Figure S9**

The high field proton  $^1\text{H}$  NMR spectrum of **12** in  $\text{CD}_2\text{Cl}_2$

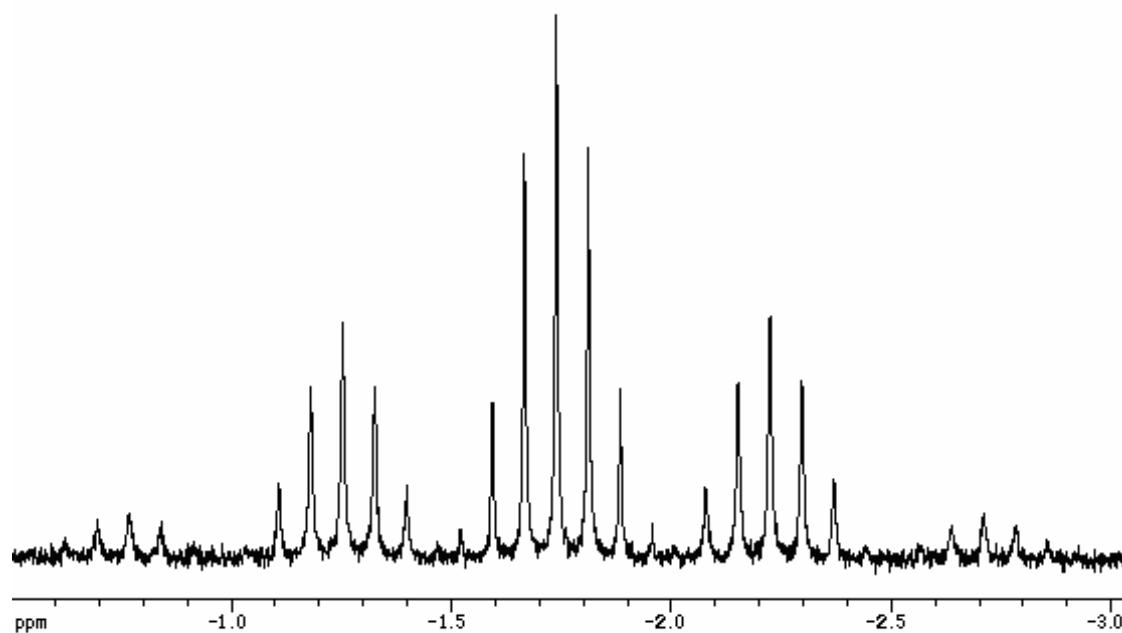

## Notes concerning the NMR spectra

**Figure S1** The  $^{31}\text{P}\{^1\text{H}\}$  NMR spectrum of **4** shown in Figure S1 has been reported previously by Venanzi and co-workers<sup>1</sup> and Paonessa and Trogler<sup>2</sup>, but in each case at  $\sim 36$  MHz. The superficial appearance of the published spectrum<sup>2</sup> is therefore quite different to that given here, which was recorded at 145.7 MHz. The numbering of the phosphorus atoms is that used by Venanzi. Our chemical shifts in  $\text{CDCl}_3$  corresponded closely to those given previously, which were measured in acetone- $\text{d}_6$ .

**Figure S7** The structure assigned to **11** from the recorded  $^{31}\text{P}\{^1\text{H}\}$  NMR ( $\text{CDCl}_3$ ) data is:

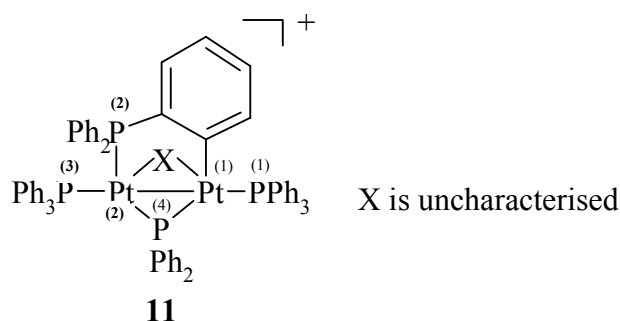

The details of the spectrum are:  $\delta$  P(1) 12.81;  $\delta$  P(2) 24.45 dd;  $\delta$  P(3) 19.81 ddd;  $\delta$  P(4) 174.5 dd in phosphido region.

$^1\text{J}[\text{P}(1)\text{--Pt}(1)] = 2978.6$  Hz;  $^1\text{J}[\text{P}(2)\text{--Pt}(2)] = 3080$  Hz;  $^1\text{J}[\text{P}(3)\text{--Pt}(2)] = 3543$  Hz;  $^1\text{J}[\text{P}(4)\text{--Pt}(1)] = 2729$  Hz;  $^1\text{J}[\text{P}(4)\text{--Pt}(2)] = 3000$  Hz;  $^2\text{J}[\text{P}(2)\text{--P}(3)] = 8.7$  Hz;  $^2\text{J}[\text{P}(2)\text{--P}(4)] = 257$  Hz;  $^2\text{J}[\text{P}(3)\text{--P}(4)] = 15$  Hz;  $^2\text{J}[\text{P}(2)\text{--Pt}(1)] = 4.6$  Hz;  $^2\text{J}[\text{P}(3)\text{--Pt}(1)] = 456$  Hz;  $^3\text{J}[\text{P}(1)\text{--P}(3)] = 139.6$  Hz.

**11** was also detected in a solution of **5** (20.0 mg, 0.0131 mmol) in methanol ( $35.0\text{ cm}^3$ ) which had been irradiated with  $uv$  light (366 nm) from a medium pressure mercury lamp for  $2\frac{3}{4}$  hours, by which time the solution had developed a deep clear-yellow colouration. The methanol was removed under reduced pressure, to yield a yellow powder which was analysed by  $^{31}\text{P}\{^1\text{H}\}$  NMR( $\text{CDCl}_3$ ). The powder was found to be a mixture of **5** and **11**. The integrated ratio of these products was approximately 3:1.

**Figure S10** Mass Spectrum of 1-methoxy-1-vinyloxyhexane, showing peak at  $m/z=115$  not present in 4-methoxyoctane.

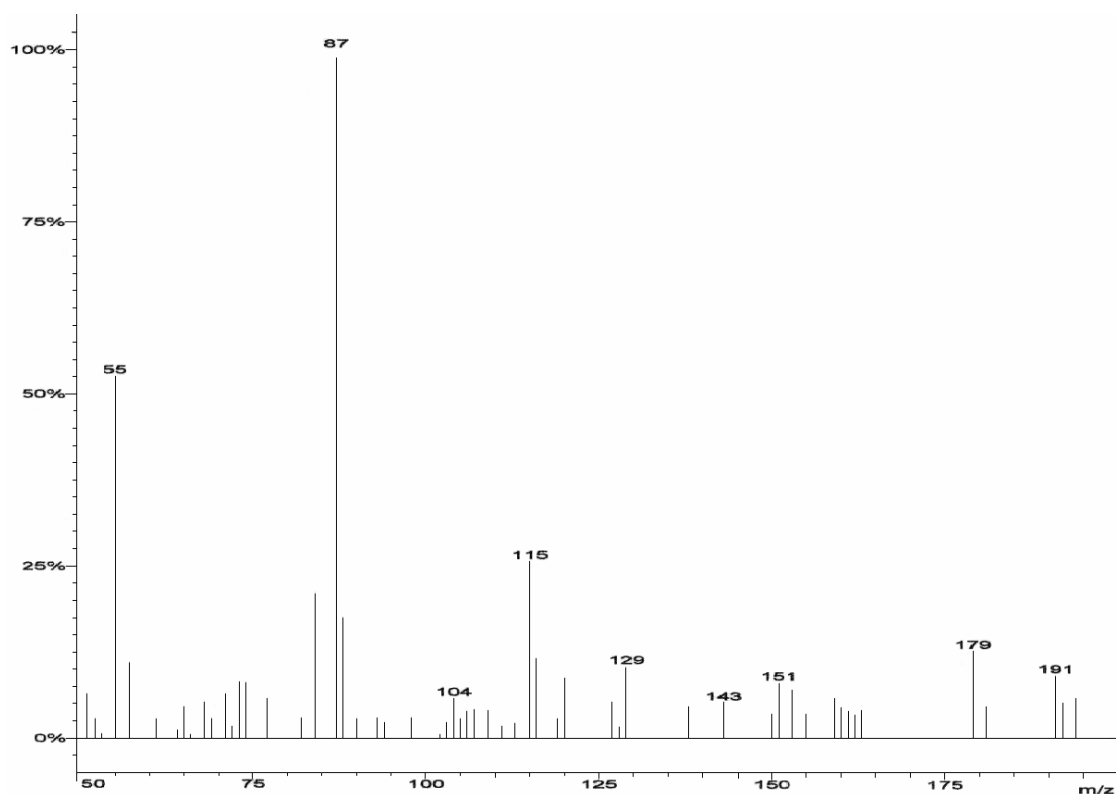

**Figure S11** Mass Spectrum of 4-methoxyoctane showing peak at  $m/z=101$  not present in 1-methoxy-1-vinyloxyhexane.

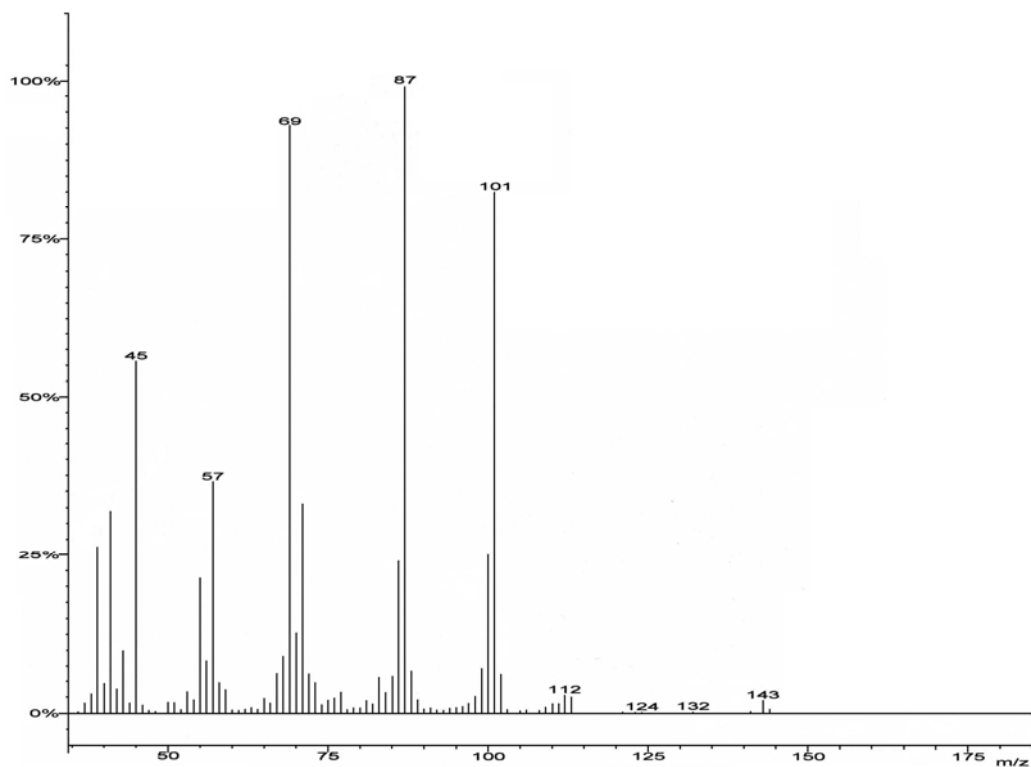

**Comments on the fate of **12** during the catalytic reactions, and some background information relating the newly discovered catalytic activity of **12** to Jensen and Trogler's earlier work.**

We were not able to characterise any of the inorganic products derived from **12** in the catalytic tests. However, on the basis of our  $^{31}\text{P}\{^1\text{H}\}$  NMR studies, we deduced that some of these products may have contained a catalytic cluster, with one or more Pt-PPh<sub>2</sub>-Pt bonds, which may have been responsible for the formation of *trans*-2-octenal. The role of **12** in the formation of *trans*-2-octenal is unknown.

An attempt was made to compare the reactivity of **1**[BF<sub>4</sub>] and **12**[BF<sub>4</sub>] towards 1-octene, and if possible, to characterise any compounds arising from the interaction of these catalytic precursors and 1-octene. In the absence of 1-octene both complexes are stable in CD<sub>2</sub>Cl<sub>2</sub> for many months at room temperature in the dark, but on the addition of 1-octene a reaction occurs in both cases. In the case of **12**[BF<sub>4</sub>] the peak at ~59 ppm in the  $^{31}\text{P}\{^1\text{H}\}$  NMR spectrum decreases over a period of a month and new peaks with coupling to  $^{195}\text{Pt}$  appear at  $\delta$  44.2, 43.58, and 43.0 ppm. These peaks may be due to organometallic compounds of platinum. We were unable to isolate and characterise this species, which on further standing led to dppePtCl<sub>2</sub>. The  $^1\text{H}$  NMR spectrum showed that there was very little isomerisation of the 1-octene to internal isomers. In contrast **1**[BF<sub>4</sub>] caused the double bond isomerisation of the 1-octene within a few hours, but there was little change in the  $^{31}\text{P}\{^1\text{H}\}$  spectrum of the complex until after a month. These experiments were carried out with both treated and untreated 1-octene, and also in CDCl<sub>3</sub> in place of CD<sub>2</sub>Cl<sub>2</sub>, but with the same results. These NMR observations demonstrate that the reactivity of **12**[BF<sub>4</sub>] and **1**[BF<sub>4</sub>] towards 1-octene differ fundamentally. However, further work is necessary to establish the reactivity of the trinuclear complex **12**[BF<sub>4</sub>] towards 1-octene and any intermediates that might participate in a catalytic cycle leading to the formation of 1-methoxyoctane. Both **1**[BF<sub>4</sub>] and **12**[BF<sub>4</sub>] catalysed the double bond isomerisation of 1-octene in the catalytic experiments.

It is possible that Jensen and Trogler's original catalytic system contained a trinuclear complex. In later studies, Trogler<sup>7</sup> suggested that the 3-coordinate species (Me<sub>3</sub>P)PtH<sub>2</sub> was a viable intermediate in the decomposition of (Me<sub>3</sub>P)<sub>2</sub>PtH<sub>2</sub>, given in

eqn (S2). He discovered that solutions of  $(\text{Me}_3\text{P})_2\text{PtH}_2$  decomposed to  $\text{Pt}(\text{PMe}_3)_4$ , “unidentified cluster complexes” and platinum metal, according to eqn (S2). The highly reactive 14-electron species  $[(\text{Me}_3\text{P})_2\text{Pt}^0]_{\text{solv}}$  in THF, was considered to be a transient intermediate in this reaction.

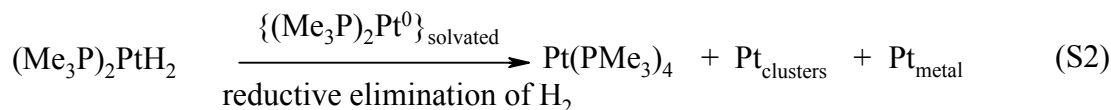

Therefore, as part of his workup procedure, Trogler<sup>8</sup> purged the residual hydrogen gas from his freshly prepared solutions of *trans*- $[(\text{Me}_3\text{P})_2\text{PtHCl}]$  with nitrogen, to decompose any impurities of  $(\text{Me}_3\text{P})_2\text{PtH}_2$ .

We postulate that an alternative to eqn (S2) is the formation of clusters as given in eqn (S3),

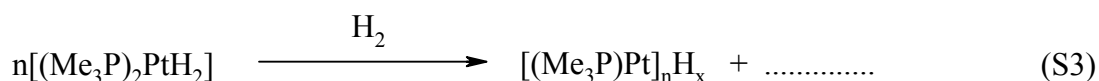

so that Trogler may have unwittingly had a cluster complex in his catalytic system. The feasibility of eqn (2) is implied by the already known syntheses of the four platinum clusters  $\{\text{Pt}_5\text{H}_8[\text{P}(\text{Bu}^t)_2\text{Ph}]_5\}$ ,<sup>9</sup>  $\{\text{Pt}_4\text{H}_2[\text{P}(\text{Bu}^t)_3]_4\}$ ,  $\{\text{Pt}_4\text{H}_8[\text{PPr}^i_2\text{Ph}]_4\}$  and  $\{\text{Pt}_3(\mu\text{-H})_3\text{H}_3[\text{P}(\text{Bu}^t)_3]_3\}$ <sup>10</sup> which were successfully carried out according to eqn (S4) albeit at high pressure with hydrogen gas at 300 atm., although at room temperature.

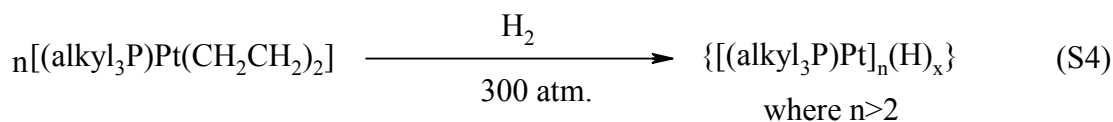

## References for Supplementary Information

1. F. Bachechi, G. Bracher, D.M. Grove, B. Kellenberger, P.S. Pregosin, L.M. Venanzi, and L. Zambonelli, *Inorg.Chem.*1983,**22**, 1031-1037.
2. R.S. Paonessa and W.C. Trogler, , *Inorg.Chem.*1983,**22**, 1038-1048.
3. R. Bender, S.-E. Bouaoud, P. Braunstein, Y. Dusauso, N. Merabet, J. Raya and D. Rouag, *J.Chem.Soc. Dalton Trans.* 1999,735-741.
4. P.L. Bellon, A. Ceriotti, F. Demartin, G. Longoni and B.T. Heaton, *J.Chem. Soc.,Dalton Trans.*, 1982,1671-1677.
5. N. Hadj-Bagheri, J. Browning, K. Dehghan, K. R. Dixon, N. J. Meanwell and R. Vefghi, *J. Organomet. Chem.*, 1990, **396**, C47-C52.
6. C. Archambault, R. Bender, P. Braunstein and Y. Dusauso, *J.Chem. Soc., Dalton Trans.*, 2002, 4084-4090.
7. D. L. Packett and W. C. Trogler, *Inorg. Chem.*, 1988, **27**, 1768-1775.
8. D.L. Packett, C.M. Jensen, R.L. Cowan, C.E. Strouse and W.C. Trogler, *Inorg.Chem.*,1985,24,3578-3583, US Patent 4,684,751
9. D. Gregson, J. A. K. Howard, M. Murray and J. L. Spencer, *J. Chem. Soc., Chem. Commun.*, 1981, 716-717.
10. P. W. Frost, J. A. K. Howard, J. L. Spencer, D. G. Turner and D. Gregson, *J. Chem. Soc.; Chem. Comm.*, 1981, 1104-1106.
